# Supplementary material for: Reversible anion intercalation in a layered aromatic amine: a high-voltage host structure for organic batteries
Source: Royal Society of Chemistry journal article supplement (doi:10.1039/c6ta02356h), 2016-01-01
Supplement: c6ta02356h1.pdf [file c6ta02356h1.pdf]

## Supporting Information

### Reversible Anion Intercalation in a Layered Aromatic Amine: A High-Voltage Host Structure for Organic Batteries

Elise Deunf<sup>a</sup>, Philippe Moreau<sup>a</sup>, Eric Quarez<sup>a</sup>, Dominique Guyomard<sup>a</sup>, Franck Dolhem<sup>bc</sup>, Philippe Poizot<sup>\*ad</sup>

<sup>a</sup>. Institut des Matériaux Jean Rouxel (IMN), UMR CNRS 6502, Université de Nantes, 2 rue de la Houssinière, B.P. 32229, 44322 Nantes Cedex 3, France.

<sup>b</sup>. Laboratoire de Glycochimie, des Antimicrobiens et des Agroressources (LG2A), FRE CNRS 3517, Université de Picardie Jules Verne, 33 rue Saint-Leu, 80039 Amiens Cedex, France.

<sup>c</sup>. Réseau sur le Stockage Electrochimique de l'Énergie (RS2E), FR CNRS 3459, France.

<sup>d</sup>. Institut Universitaire de France (IUF), 103 bd Saint-Michel, 75005 Paris Cedex 5, France.

#### Index to supporting information:

**Figure S1a.** <sup>1</sup>H and <sup>13</sup>C NMR spectra of Li<sub>2</sub>DAnT·~2THF

**Figure S1b.** <sup>1</sup>H and <sup>13</sup>C NMR spectra of Li<sub>2</sub>DAnT

**Figure S2.** Overlaid FT-IR spectra for Li<sub>2</sub>DAnT·~2THF and Li<sub>2</sub>DAnT

**Figure S3.** TEM image of Li<sub>2</sub>DAnT

**Figure S4.** FT-IR spectra of dried Li<sub>2</sub>DAnT-containing PC solvent and its corresponding thermal analysis

**Figure S5.** Potential vs differential capacity curves for Li/Li<sub>2</sub>DAnT cells using either PC/LiClO<sub>4</sub> 1 M or PC/LiTFSI 1 M as electrolyte (rate: 1 electron exchanged in 2 h)

**Figure S6.** Discharge capacity retention curves for Li/Li<sub>2</sub>DAnT cells cycled at a rate of 1 electron in 2 h or 20 h using PC/LiClO<sub>4</sub> 1 M as electrolyte

**Figure S7.** Electrochemical evaluation of the two-electron reaction for Li<sub>2</sub>DAnT measured in Li half cells using different PC-based electrolytes

**Figure S8.** Long-term cycling of pure Li<sub>2</sub>DAnT (400 cycles) vs. Li with post-mortem SEM investigation

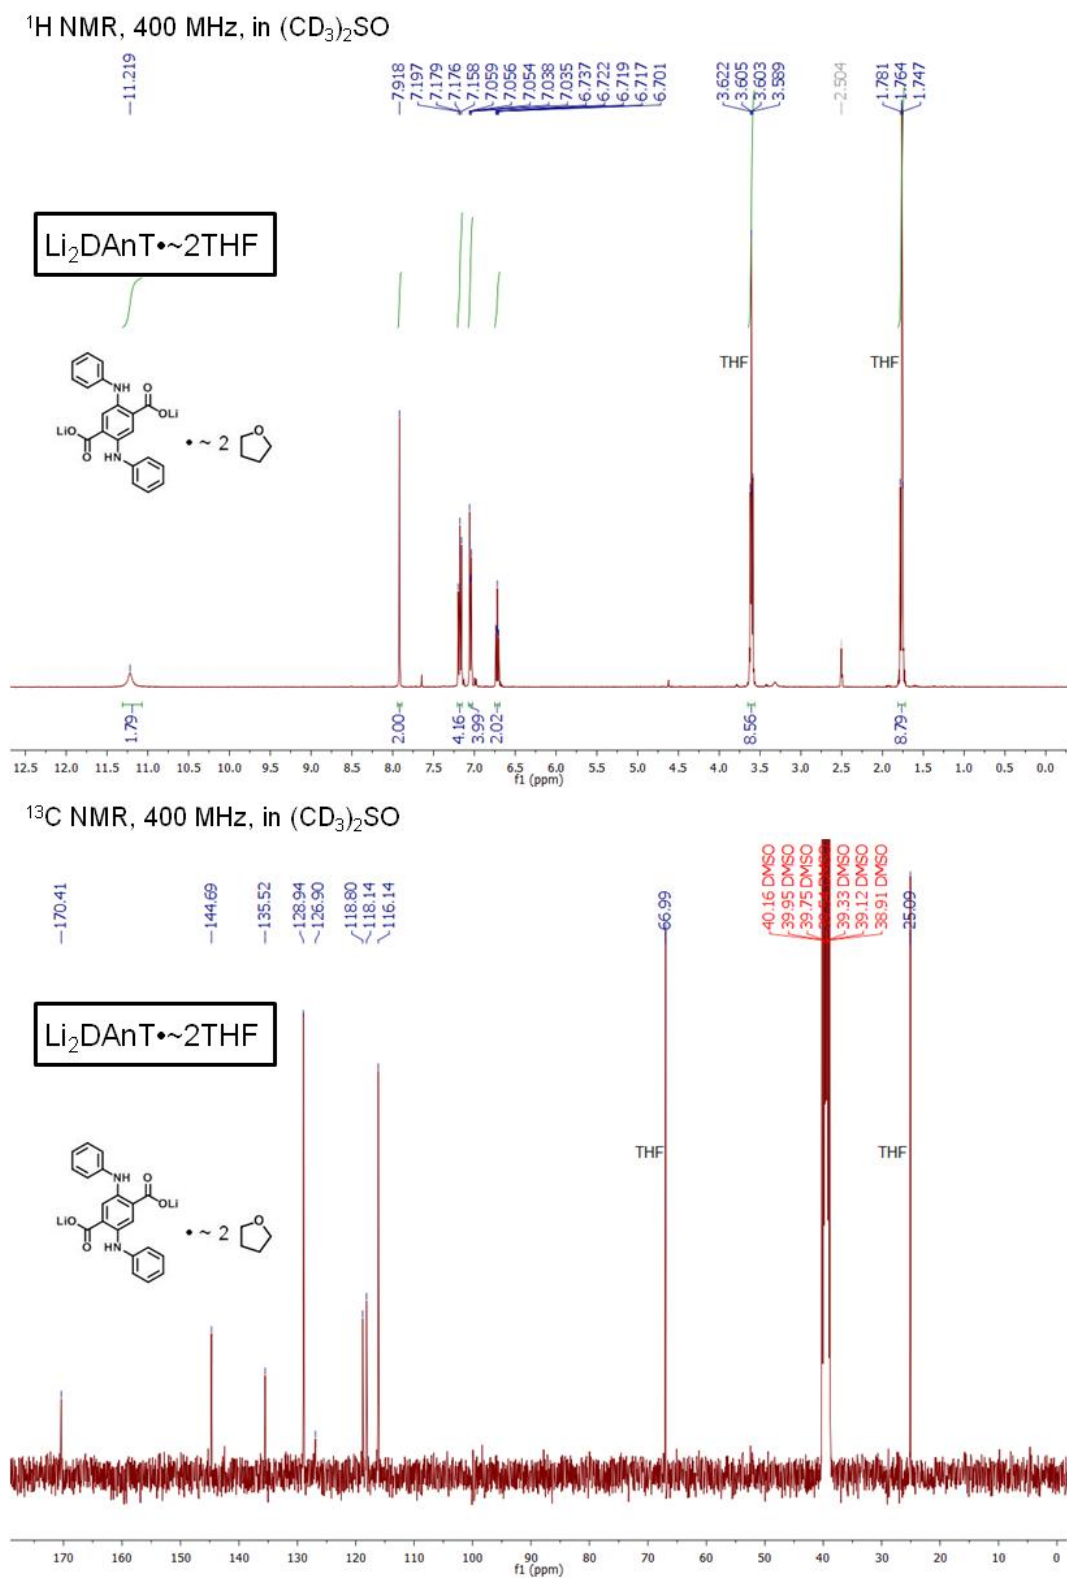

**Figure S1a.**  $^1\text{H}$  and  $^{13}\text{C}$  NMR spectra of  $\text{Li}_2\text{DAnT} \cdot \sim 2\text{THF}$  measured in  $(\text{CD}_3)_2\text{SO}$  and recorded on a 400 MHz apparatus.

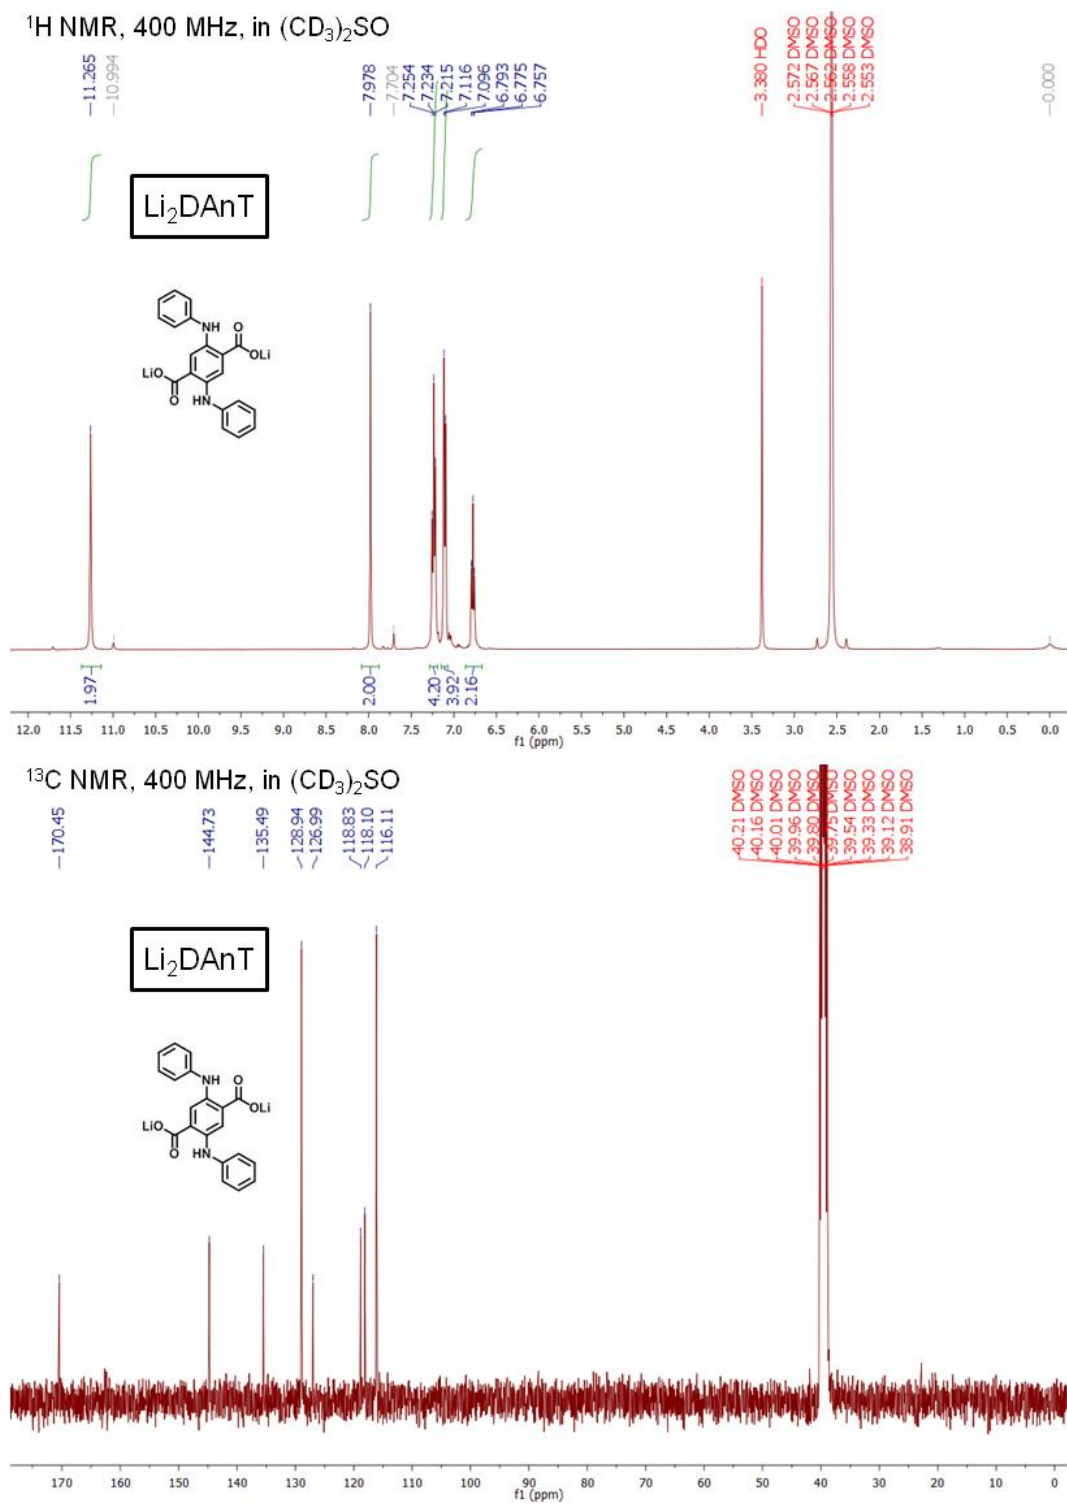

**Figure S1b.**  $^1\text{H}$  and  $^{13}\text{C}$  NMR spectra of  $\text{Li}_2\text{DAnT}$  measured in  $(\text{CD}_3)_2\text{SO}$  and recorded on a 400 MHz apparatus.

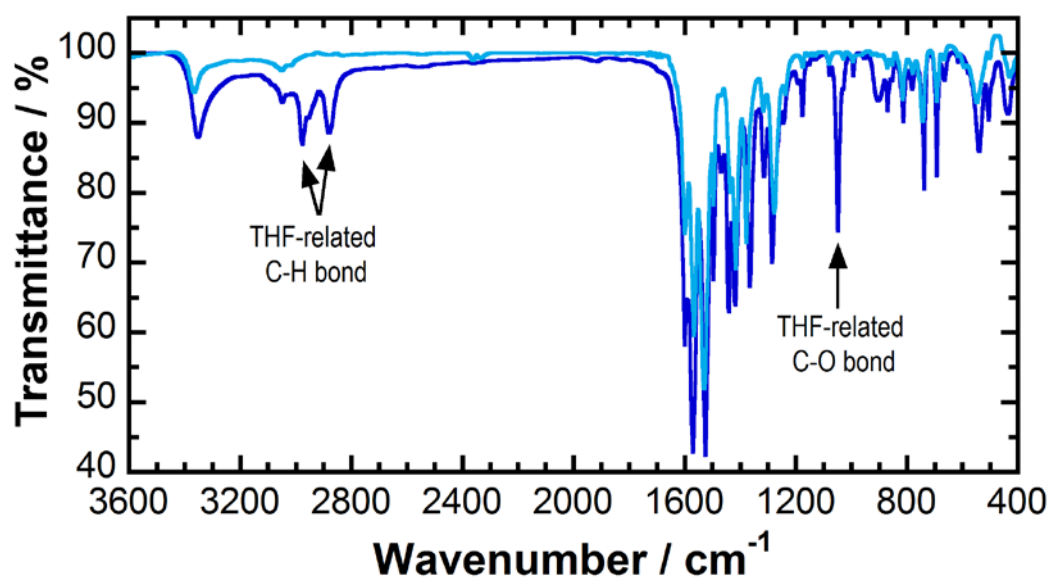

**Figure S2.** Overlaid FT-IR spectra of as-prepared Li<sub>2</sub>DAnT~2THF (deep blue) and Li<sub>2</sub>DAnT (light blue), respectively.

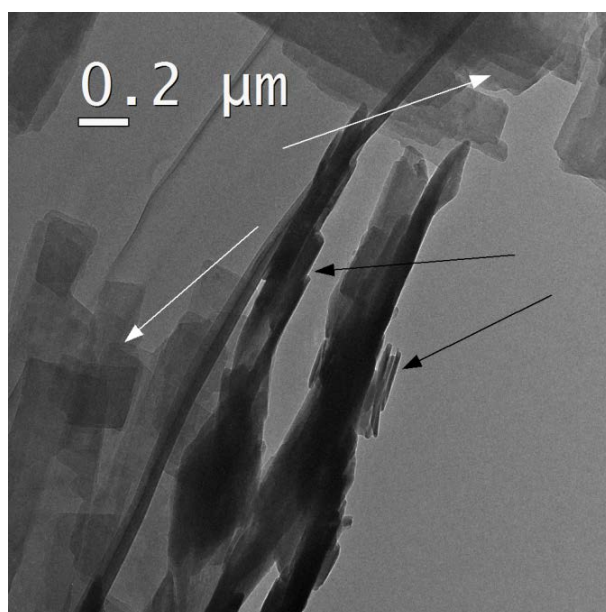

**Figure S3.** Typical TEM image of Li<sub>2</sub>DAnT confirming the obtainment of a lamellar structure. White arrows correspond to crystals lying perpendicular to the electron beam while black ones correspond to those parallel.

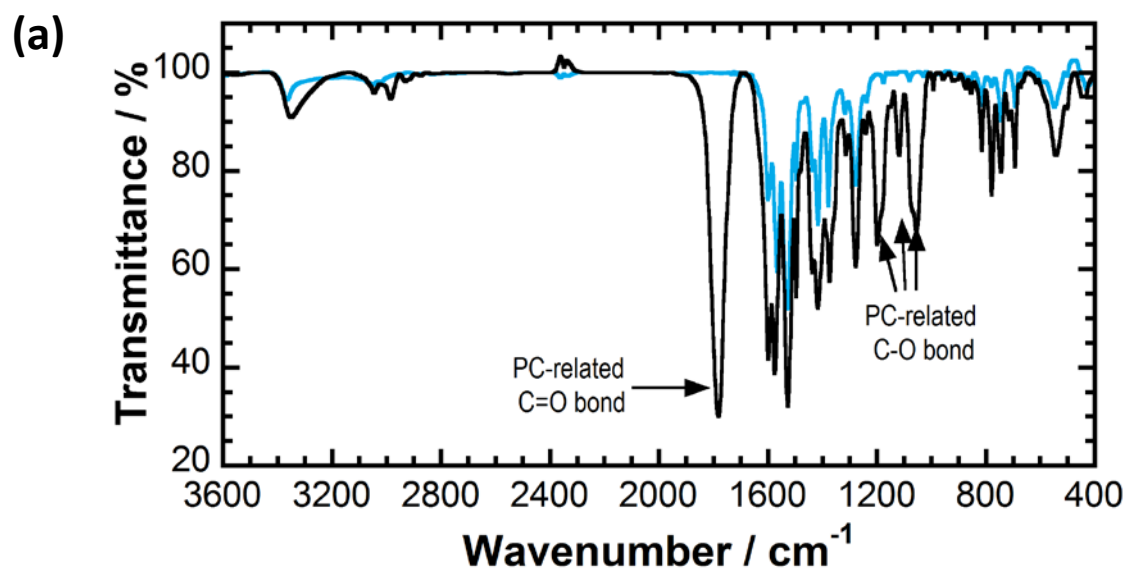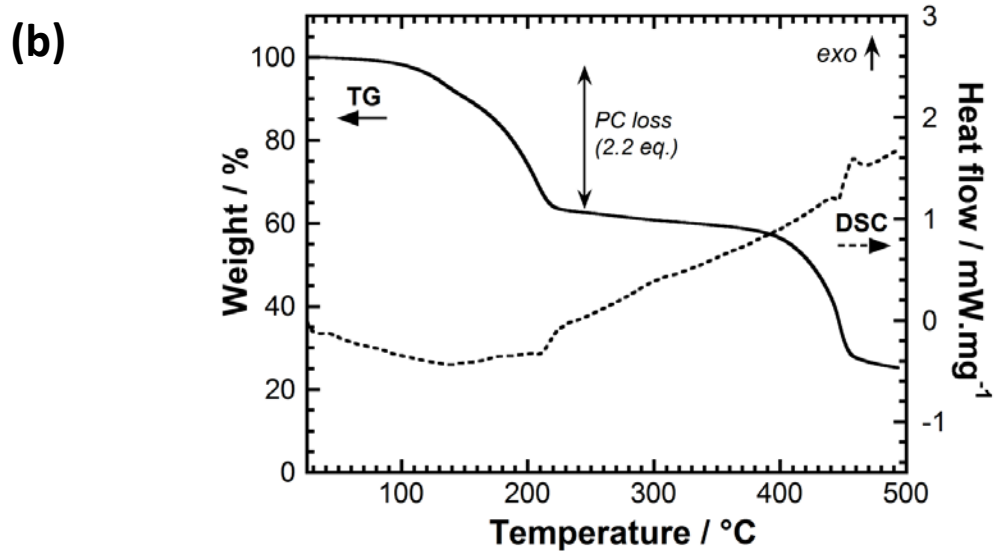

**Figure S4.** (a) Overlaid FT-IR spectra of  $\text{Li}_2\text{DAnT}$  (light blue) and  $\text{Li}_2\text{DAnT}$  soaked in PC then dried (black). (b) TG-DSC traces of  $\text{Li}_2\text{DAnT}$  soaked in PC then dried measured under argon at a heating rate of  $5\text{ }^{\circ}\text{C}\cdot\text{min}^{-1}$ .

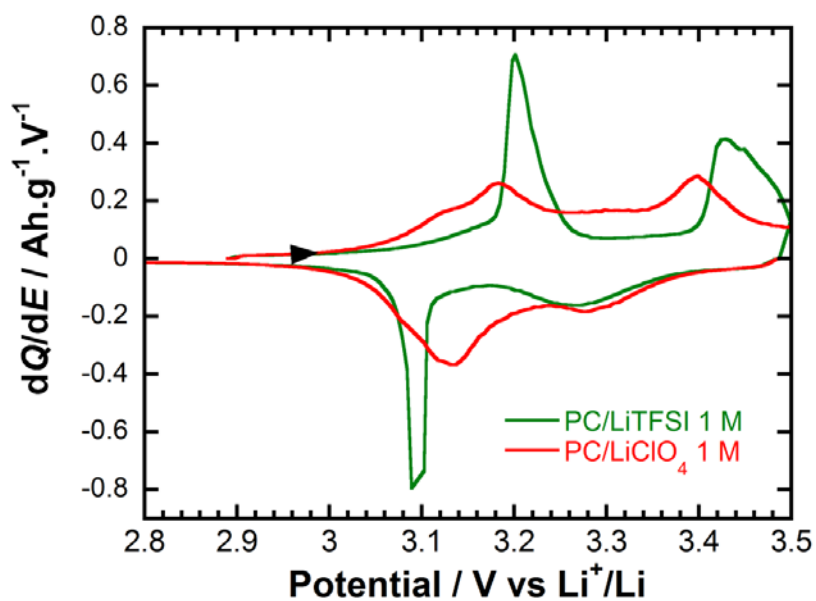

**Figure S5.** Overlaid of the differential capacity vs potential curves regarding the first cycle of  $\text{Li}_2\text{DAnT}/\text{Li}$  half cells cycled in  $\text{PC}/\text{LiClO}_4$  1 M (red) and  $\text{PC}/\text{LiTFSI}$  1 M (green), respectively (extracted from potential-specific capacity curves reported in Figure 5).

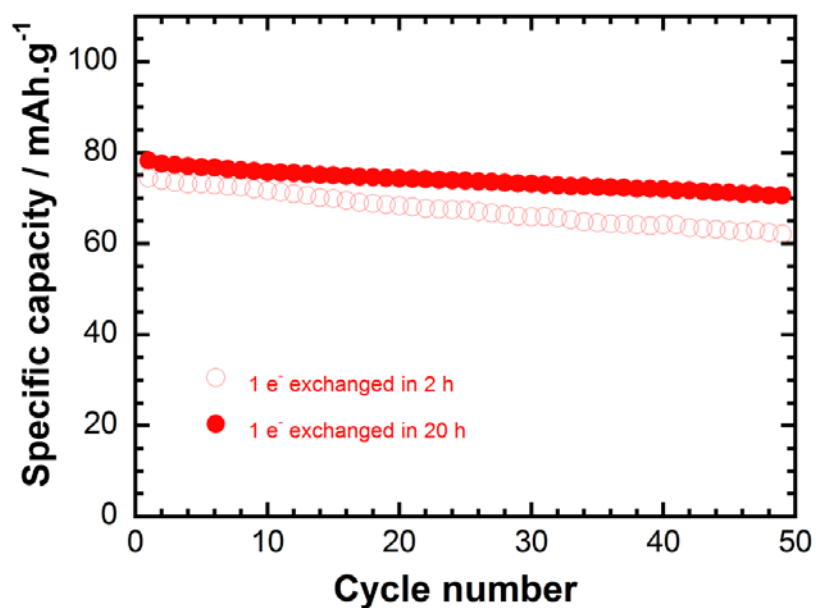

**Figure S6.** Discharge capacity retention curves for  $\text{Li}$  half cells using  $\text{Li}_2\text{DAnT}$  as active electrode material mixed with 33 wt% of carbon black and galvanostatically cycled at a rate of 1 electron exchanged in 2 h ( $i_m = 37.3 \text{ mA.g}^{-1}$ ) or 20 h ( $i_m = 3.73 \text{ mA.g}^{-1}$ ), respectively, using  $\text{PC}/\text{LiClO}_4$  1 M as electrolyte.

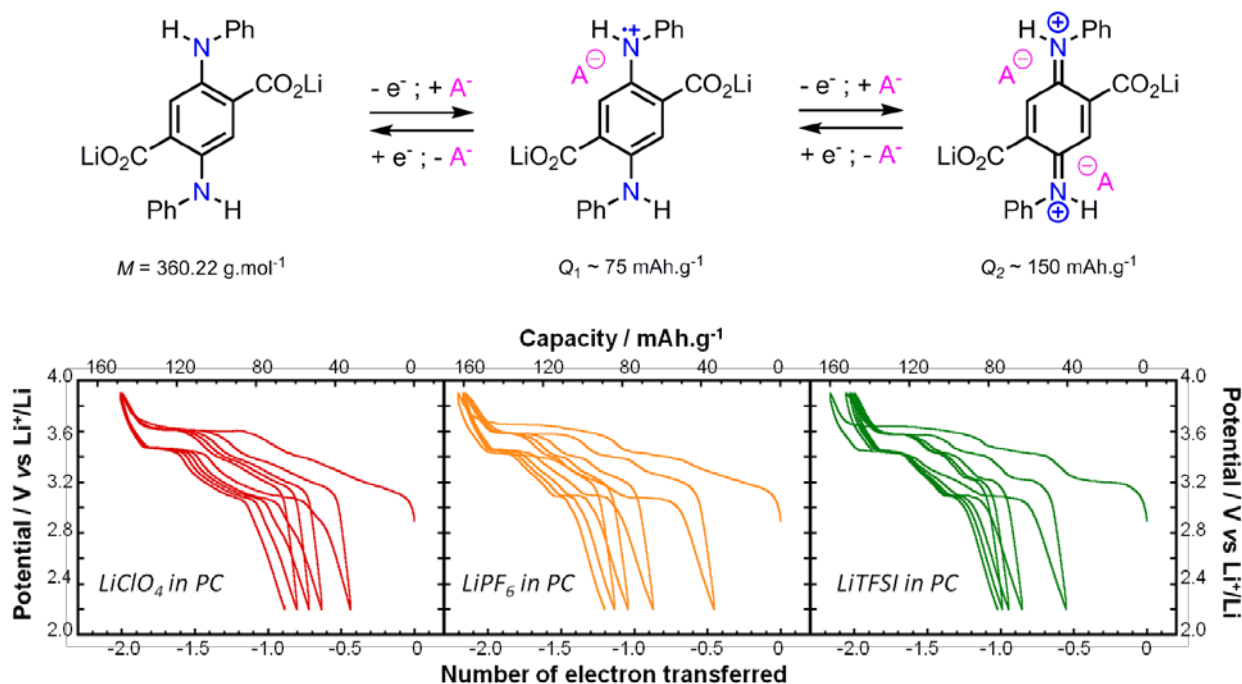

**Figure S7.** Electrochemical evaluation of the two-electron reaction for  $\text{Li}_2\text{DANt}$  measured in Li half cells using 33 wt% of carbon black and galvanostatically cycled at a rate of 1 electron exchanged in 5 h ( $I_m = 15 \text{ mA.g}^{-1}$ ) in different electrolytes (red:  $\text{PC/LiClO}_4$  1 M; orange:  $\text{PC/LiPF}_6$  1 M; green:  $\text{PC/LiTFSI}$  1 M). The expected electrochemical process for  $\text{Li}_2\text{DANt}$  is also indicated at the molecular level.

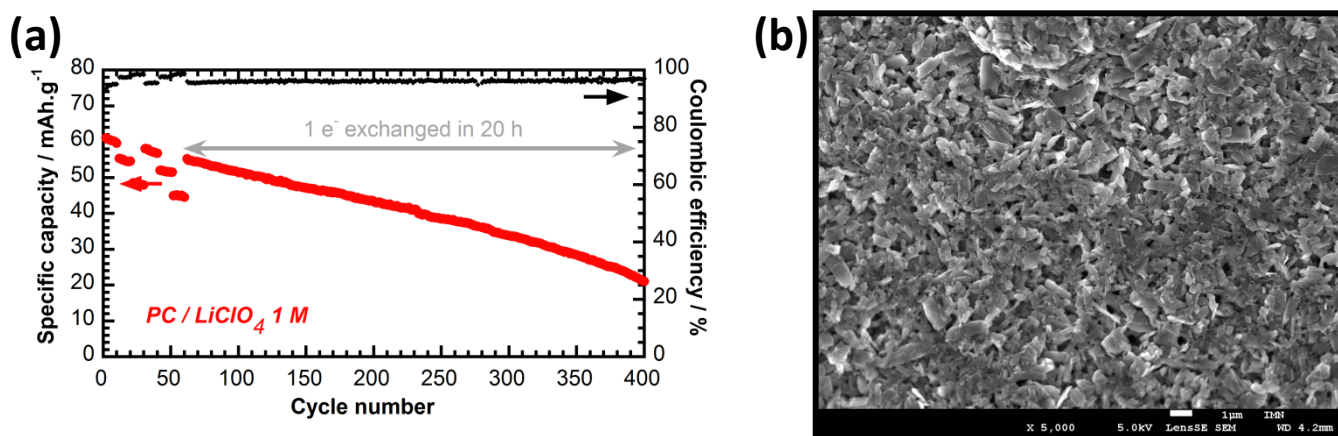

**Figure S8.** (a) Same discharge capacity retention curves with coulombic efficiency as reported in Figure 6b extended to 400 cycles (long-term cycling). (b) SEM imaging of the positive electrode material after 400 cycles (no binder, no carbon additive). Note that no metallization of the sample was performed for the SEM investigation.
